# Supplementary material for: Organophosphate esters (OPEs) in atmospheric particulate matter in different Brazilian regions
Source: Royal Society of Chemistry journal article supplement (doi:10.1039/d3ea00079f), 2023-01-01
Supplement: d3ea00079f1.pdf [file d3ea00079f1.pdf]

## Supplementary Material

### Organophosphate esters (OPEs) in atmospheric particulate matter in different Brazilian regions

Priscila Boleta Gonçalves<sup>a</sup>, Joyce Cristale<sup>a</sup>, Amanda Araújo da Silva<sup>a</sup>, Danilo Covaes Nogarotto<sup>a</sup>, Daniela Montanari Migliavacca Osório<sup>a</sup>, Lincoln Lucilio Romualdo<sup>b</sup>, Simone Andréa Pozza<sup>a\*</sup>

<sup>a</sup>School of Technology, University of Campinas, R. Paschoal Marmo, 1888, Limeira, SP, Brazil, 13484-332

<sup>b</sup>Federal University of Catalão, Av. Dr. Lamartine Pinto de Avelar, 1120, Setor Universitário, Catalão, GO, Brazil, 75705-220

\*Corresponding author: [spozza@unicamp.br](mailto:spozza@unicamp.br)

Number of pages: 5

Number of tables: 5

## Table of Contents

|                                                                                                                  |   |
|------------------------------------------------------------------------------------------------------------------|---|
| <b>Table S1.</b> CAS number and purity of standards. ....                                                        | 3 |
| <b>Table S2.</b> MDL, MQL, recovery e relative standard deviation (RSD).....                                     | 3 |
| <b>Table S3.</b> Retention time, quantification ion and confirmation ion used in SIM detection for each OPE..... | 3 |
| <b>Table S4.</b> Retention time, precursor ion and product ion used in MS/MS detection for each OPE. ....        | 4 |
| <b>Table S5.</b> OPEs concentration in PM <sub>10</sub> in Catalão, Limeira and Novo Hamburgo. ....              | 5 |

**Table S1.** CAS number and purity of standards.

| Standards | CAS#       | Purity of standards (%) |
|-----------|------------|-------------------------|
| TNBP      | 126-73-8   | 99.5                    |
| TCEP      | 115-96-8   | 99                      |
| TCIPP     | 13674-84-5 | 95.5                    |
| TDCIPP    | 13674-87-8 | 95.9                    |
| TPHP      | 115-86-6   | 99.5                    |
| TBOEP     | 78-51-3    | 95.6                    |
| EHDPHP    | 1241-94-7  | 90                      |
| TEHP      | 78-42-2    | 98                      |
| TMPP      | 1330-78-5  | 99.4                    |

**Table S2.** MDL, MQL, recovery e relative standard deviation (RSD).

| Compounds | MDL<br>(ng m <sup>-3</sup> ) | MQL<br>(ng m <sup>-3</sup> ) | REC<br>(%) | RSD<br>(%) |
|-----------|------------------------------|------------------------------|------------|------------|
| TNBP      | 0.004                        | 0.014                        | 116        | 18         |
| TCEP      | 0.020                        | 0.061                        | 124        | 15         |
| TCIPP     | 0.009                        | 0.029                        | 134        | 23         |
| TDCIPP    | 0.020                        | 0.066                        | 109        | 7          |
| TPHP      | 0.002                        | 0.013                        | 120        | 34         |
| TBOEP     | 0.020                        | 0.061                        | 89         | 10         |
| EHDPHP    | 0.023                        | 0.056                        | 80         | 17         |
| TEHP      | 0.007                        | 0.024                        | 66         | 21         |
| TMPP      | 0.011                        | 0.036                        | 89         | 5          |

**Table S3.** Retention time, quantification ion and confirmation ion used in SIM detection for each OPE.

| Compounds | Retention time (min) | Quantification ion (m/z) | Confirmation ion (m/z) |
|-----------|----------------------|--------------------------|------------------------|
| TNBP      | 18.7                 | 103                      | 99                     |
| TCEP      | 20.3                 | 249                      | 251; 99                |
| TCIPP     | 20.2                 | 201                      | 125; 99                |
| TDCIPP    | 25.6                 | 381                      | 191; 99                |
| TPHP      | 26.1                 | 325                      | 233; 326               |
| TBOEP     | 26.1                 | 125                      | 199; 99                |
| EHDPHP    | 26.2                 | 251                      | 249                    |
| TEHP      | 26.4                 | 99                       | 113                    |
| TMPP      | 28.2                 | 367                      | 261; 368               |

**Table S4.** Retention time, precursor ion and product ion used in MS/MS detection for each OPE.

| Compounds | Retention time (min) | Precursor ion (m/z) | Product ion (m/z) |
|-----------|----------------------|---------------------|-------------------|
| TNBP      | 18.7*                | 99                  | 81                |
| TCEP      | 20.3*                | 249                 | 125               |
|           | 20.3**               | 125                 | 99                |
| TCIPP     | 20.2*                | 201                 | 125               |
|           | 20.2**               | 99                  | 81                |
| TDCIPP    | 25.6*                | 191                 | 155               |
|           | 25.6**               | 99                  | 81                |
| TPHP      | 26.1*                | 233                 | 215               |
|           | 26.1**               | 326                 | 228               |
| TBOEP     | 26.1*                | 199                 | 125               |
|           | 26.1**               | 99                  | 81                |
| EHDPHP    | 26.2*                | 251                 | 215               |
|           | 26.2**               | 251                 | 155               |
| TEHP      | 26.4**               | 99                  | 81                |
|           | 28.2*                | 261                 | 243               |
| TMPP      | 28.2**               | 367                 | 331               |
|           | 28.2**               | 368                 | 261               |

\* Quantification ion \*\* Confirmation ion

MS/MS reactions obtained using automatic fragmentation mode (Xcalibur Software)

**Table S5.** OPEs concentration in PM<sub>10</sub> in Catalão, Limeira and Novo Hamburgo.

| City             | Date         | PM <sub>10</sub><br>concentration<br>( $\mu\text{g m}^{-3}$ ) | Temperature<br>(°C) | Relative<br>humidity<br>(%) | Wind<br>speed<br>(km/h) | Pressure<br>(mmHg) | Concentration of compounds (ng m <sup>-3</sup> ) |        |       |       |        |
|------------------|--------------|---------------------------------------------------------------|---------------------|-----------------------------|-------------------------|--------------------|--------------------------------------------------|--------|-------|-------|--------|
|                  |              |                                                               |                     |                             |                         |                    | TNBP                                             | TDCIPP | TPHP  | TBOEP | EHDPHP |
| Catalão          | Jun 12, 2019 | 30                                                            | 20.6                | 61                          | 6.5                     | 689                | 1.3                                              |        | 0.27  | 0.11  | <MQL   |
|                  | Jun 18, 2019 | 30                                                            | 21.1                | 54                          | 6.1                     | 689                | 1.3                                              |        | 0.30  |       | 0.049  |
|                  | Jun 30, 2019 | 16                                                            | 21.2                | 58                          | 7.2                     | 688                | 0.36                                             |        | 0.13  |       |        |
|                  | Jul 6, 2019  | 13                                                            | 16.9                | 59                          | 6.5                     | 689                | 0.35                                             |        | 0.037 |       | <MQL   |
|                  | Jul 12, 2019 | 34                                                            | 21.2                | 44                          | 5.0                     | 688                | 0.38                                             |        | 0.18  |       | 0.034  |
|                  | Jul 18, 2019 | 51                                                            | 19.5                | 61                          | 9.0                     | 690                | 0.19                                             |        | 0.20  |       | 0.034  |
|                  | Jul 24, 2019 | 27                                                            | 21.0                | 54                          | 7.2                     | 689                | 0.26                                             |        | 0.17  |       | <MQL   |
|                  | Jul 30, 2019 | 25                                                            | 21.5                | 47                          | 5.8                     | 688                | 0.21                                             |        | 0.10  |       | <MQL   |
| Limeira          | Jun 7, 2019  | 28                                                            | 17.9                | 44                          | 0.6                     | 709                |                                                  |        | 0.33  | 0.13  | 0.11   |
|                  | Jun 12, 2019 | 49                                                            | 20.7                | 36                          | 0.3                     | 708                |                                                  |        | 0.48  | 0.23  | 0.096  |
|                  | Jun 18, 2019 | 53                                                            | 20.2                | 41                          | 0.2                     | 707                |                                                  | 0.22   | 0.65  | 0.11  | 0.084  |
|                  | Jun 24, 2019 | 31                                                            | 20.8                | 36                          | 0.2                     | 705                |                                                  | 0.28   | 0.90  |       | 0.066  |
|                  | Jun 30, 2019 | 38                                                            | 22.7                | 37                          | 0.6                     | 706                |                                                  |        | 0.41  |       | 0.071  |
|                  | Jul 6, 2019  | 6.6                                                           | 10.6                | 42                          | 0.2                     | 710                |                                                  |        | 0.096 |       |        |
|                  | Jul 12, 2019 | 70                                                            | 18.9                | 31                          | 0.0                     | 707                |                                                  |        | 0.84  | 0.14  | 0.12   |
|                  | Jul 18, 2019 | 24                                                            | 16.5                | 32                          | 0.2                     | 711                |                                                  |        | 0.43  |       | 0.12   |
|                  | Jul 24, 2019 | 59                                                            | 20.0                | 34                          | 0.3                     | 708                |                                                  |        | 0.90  | 0.076 | 0.13   |
|                  | Jul 30, 2019 | 45                                                            | 21.0                | 32                          | 0.3                     | 707                |                                                  | 0.10   | 0.44  | 0.13  | 0.12   |
| Novo<br>Hamburgo | Jun 12, 2019 | 24                                                            | 15.3                |                             | 2.1                     | 764                |                                                  |        |       | 0.079 | 0.093  |
|                  | Jun 18, 2019 | 33                                                            | 19.7                |                             | 3.4                     | 760                |                                                  |        |       | 0.19  | 0.16   |
|                  | Jun 30, 2019 | 14                                                            | 23.1                |                             | 2.7                     | 757                |                                                  |        |       |       | <MQL   |
|                  | Jul 6, 2019  | 19                                                            | 8.1                 |                             | 13.8                    | 769                |                                                  |        |       |       | <LOQ   |
|                  | Jul 13, 2019 | 31                                                            | 18.6                |                             | 3.1                     | 759                |                                                  |        |       | 0.11  | 0.064  |
|                  | Jul 18, 2019 | 31                                                            | 13.1                |                             | 1.0                     | 767                |                                                  |        |       | 0.56  | 0.081  |
|                  | Jul 24, 2019 | 11                                                            | 17.4                |                             | 2.4                     | 763                |                                                  |        |       | 0.26  | <MQL   |
|                  | Jul 30, 2019 | 20                                                            | 17.7                |                             | 2.4                     | 761                |                                                  |        |       | 0.11  | <MQL   |

Note: blanks in the table refer to undetected compounds
